# Supplementary material for: Antibiofilm Effect of Nitric Acid-Functionalized Carbon Nanotube-Based Surfaces against E. coli and S. aureus
Source: MDPI journal article supplement (doi:10.3390/antibiotics12111620), 2023-11-11
Supplement: s1 [file s1]

## Supplementary Material

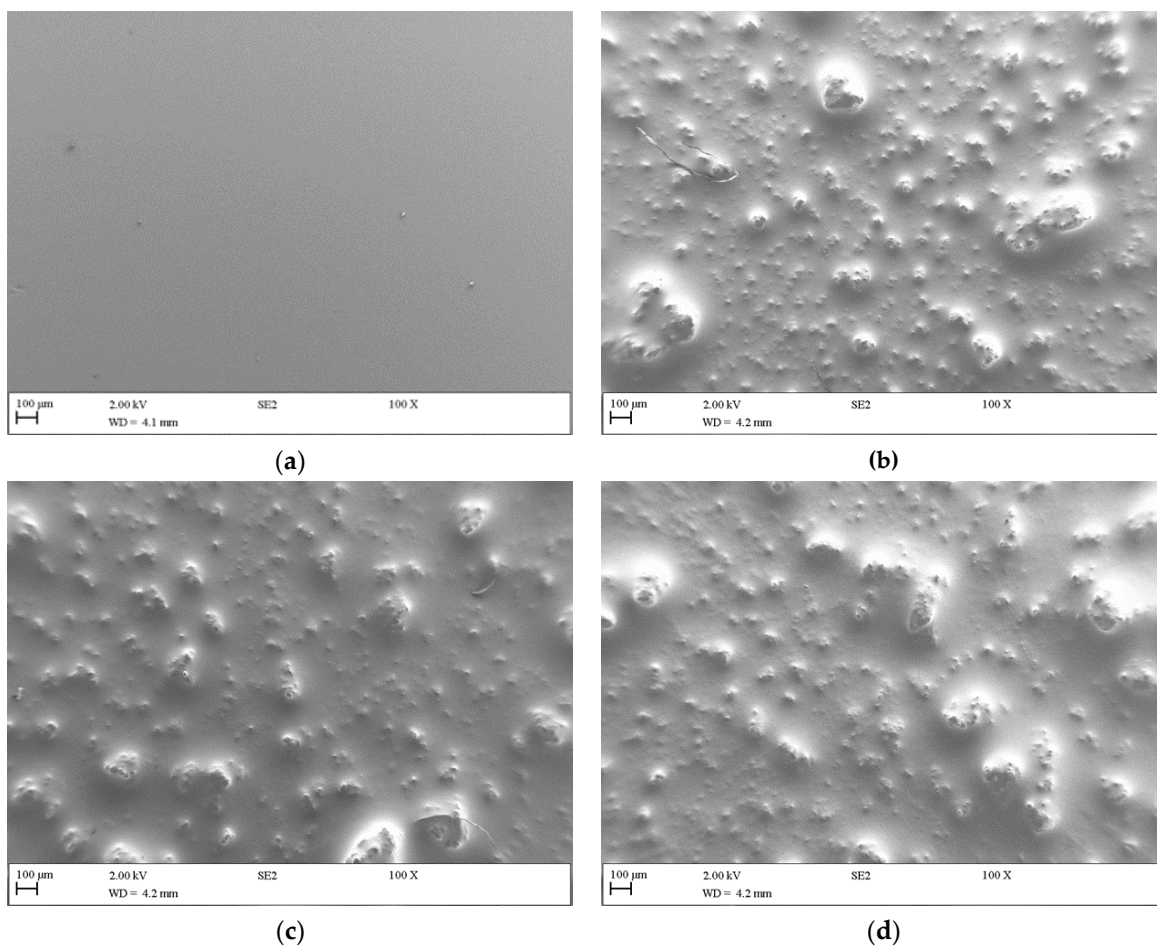

**Figure S1.** SEM images of (a) PDMS, (b) p-MWCNT/PDMS, (c) f-MWCNT\_N/PDMS, and (d) f-MWCNT\_N600/PDMS composites (magnification of 100×).

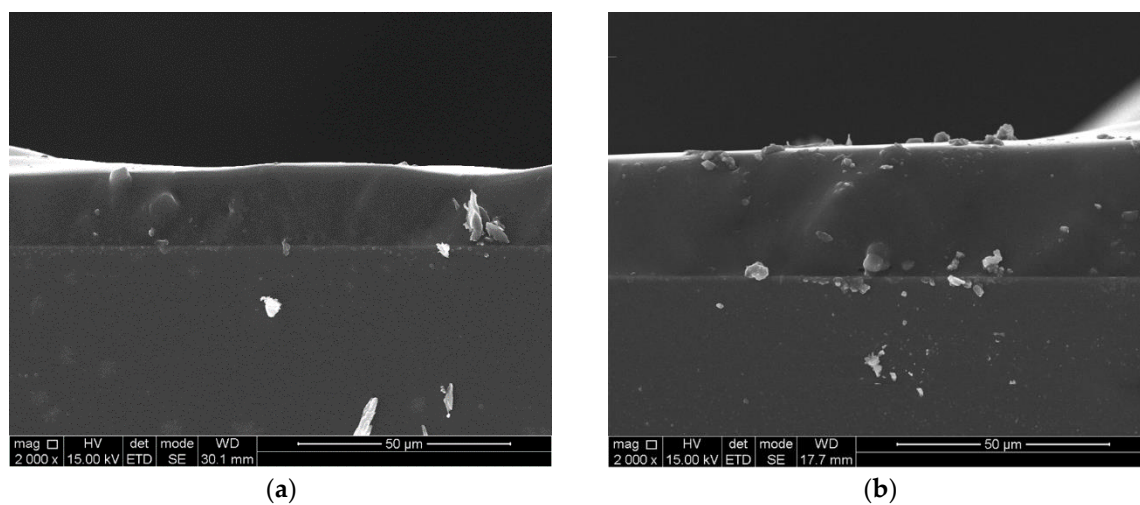

**Figure S2.** SEM images of (a) p-MWCNT/PDMS and (b) f-MWCNT\_N/PDMS cross-sections (magnification of 2000 $\times$ ).

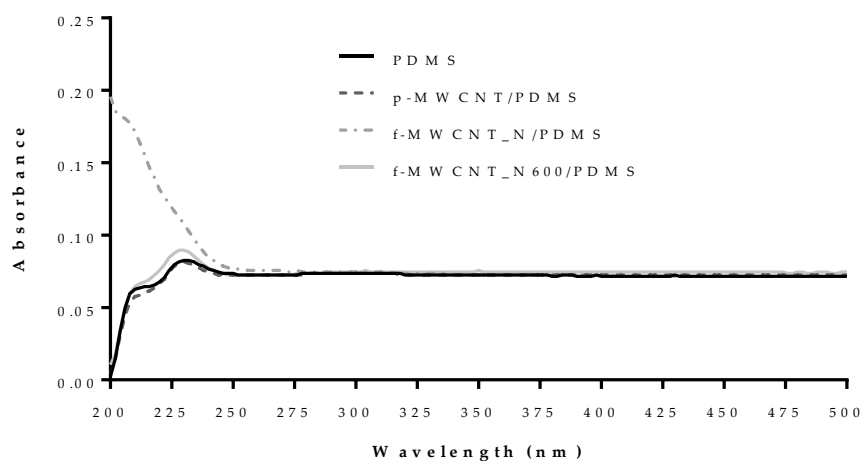

**Figure S3.** UV-Vis spectra of water after contact with PDMS, p-MWCNT/PDMS, f-MWCNT\_N/PDMS, and f-MWCNT\_N600/PDMS.

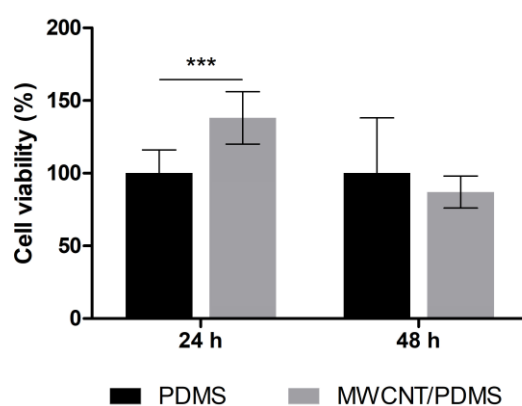

**Figure S4.** Effect of MWCNT/PDMS composites on the viability of human kidney proximal tubule (HK-2) cells after 24 and 48 h of exposure. Significant differences between the viability of HK-2 cells exposed to PDMS and MWCNT/PDMS composites are denoted as \*\*\* ( $p < 0.001$ ).
